# Supplementary material for: Phytostabilization of Heavy Metals and Fungal Community Response in Manganese Slag under the Mediation of Soil Amendments and Plants
Source: MDPI journal article supplement (doi:10.3390/toxics12050333), 2024-04-30
Supplement: s1 [file s1]

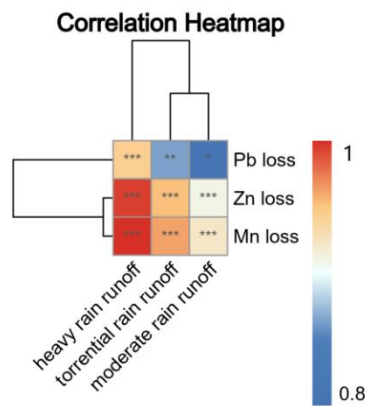

**Figure S1.** Pearson correlation analysis of the loss of heavy metals and runoff volume; \*, \*\*, and \*\*\* respectively represents significant difference ( $P < 0.05$ ), ( $P < 0.01$ ) and ( $P < 0.001$ ).

**Table S1.** Chemical forms of soil HMs (Mn, Pb, and Zn) in different groups after phytoremediation using BCR method (mean  $\pm$  S.D.,  $n = 3$ ).

| Chemical form | Group | Heavy metal (%)   |                   |                   |
|---------------|-------|-------------------|-------------------|-------------------|
|               |       | Mn                | Pb                | Zn                |
| Residual      | CK    | 18.66 $\pm$ 0.40b | 11.80 $\pm$ 0.45b | 15.16 $\pm$ 0.24b |
|               | M0    | 17.39 $\pm$ 0.18c | 10.25 $\pm$ 0.09c | 14.28 $\pm$ 0.13c |
|               | M1    | 23.45 $\pm$ 0.15a | 18.36 $\pm$ 0.47a | 18.53 $\pm$ 0.23a |
| Exchangeable  | CK    | 18.49 $\pm$ 0.21a | 9.21 $\pm$ 0.34b  | 35.35 $\pm$ 0.11b |
|               | M0    | 16.49 $\pm$ 0.22b | 12.88 $\pm$ 0.62a | 39.03 $\pm$ 0.31a |
|               | M1    | 18.67 $\pm$ 0.31a | 12.37 $\pm$ 0.39a | 33.10 $\pm$ 0.20c |
| Reducible     | CK    | 36.52 $\pm$ 0.27a | 48.41 $\pm$ 0.64b | 28.09 $\pm$ 0.73c |
|               | M0    | 35.31 $\pm$ 0.33b | 50.32 $\pm$ 0.06a | 32.69 $\pm$ 0.60b |
|               | M1    | 34.23 $\pm$ 0.28c | 43.91 $\pm$ 0.50c | 34.76 $\pm$ 0.29a |
| Oxidizable    | CK    | 26.33 $\pm$ 0.18b | 30.57 $\pm$ 0.52a | 21.40 $\pm$ 0.51a |
|               | M0    | 30.81 $\pm$ 0.46a | 26.55 $\pm$ 0.54b | 14.00 $\pm$ 0.53b |
|               | M1    | 23.65 $\pm$ 0.43c | 25.36 $\pm$ 0.69c | 13.61 $\pm$ 0.25b |

CK, manganese slag without any treatment; M0, amended manganese slag without plant; M1, amended manganese slag with *K. paniculata* trees being planted; different lowercase letters in a column represent significant difference ( $P < 0.05$ ).

**Table S2.** The relative abundance of the top 10 fungal taxa at the phylum level in different groups (mean  $\pm$  S.D.,  $n = 3$ ).

| Taxonomy          | Relative abundance (%) |                  |                  |
|-------------------|------------------------|------------------|------------------|
|                   | CK                     | M0               | M1               |
| Basidiomycota     | 27.58 $\pm$ 0.95       | 87.03 $\pm$ 0.64 | 63.76 $\pm$ 0.69 |
| Ascomycota        | 52.83 $\pm$ 0.26       | 12.06 $\pm$ 0.88 | 28.45 $\pm$ 0.22 |
| Rozellomycota     | 1.15 $\pm$ 0.02        | 0.21 $\pm$ 0.17  | 3.60 $\pm$ 0.12  |
| Mortierellomycota | 0.85 $\pm$ 0.04        | 0.01 $\pm$ 0.02  | 0.68 $\pm$ 0.20  |
| Chytridiomycota   | 0.00 $\pm$ 0.01        | 0.00 $\pm$ 0.00  | 0.03 $\pm$ 0.02  |

|                 |            |           |           |
|-----------------|------------|-----------|-----------|
| Glomeromycota   | 0.02±0.01  | 0.00±0.00 | 0.00±0.00 |
| Zoopagomycota   | 0.00±0.00  | 0.00±0.00 | 0.01±0.01 |
| Kickxellomycota | 0.00±0.00  | 0.00±0.00 | 0.01±0.01 |
| others          | 17.57±0.74 | 0.68±0.30 | 3.46±0.15 |

CK, manganese slag without any treatment; M0, amended manganese slag without plant; M1, amended manganese slag with *K. paniculata* trees being planted.

**Table S3.** The relative abundance of the top 10 fungal taxa at the genus level in different groups (mean ± S.D., *n* = 3).

| Taxonomy              | Relative abundance (%) |            |            |
|-----------------------|------------------------|------------|------------|
|                       | CK                     | M0         | M1         |
| <i>Clitopilus</i>     | 0.00±0.01              | 86.28±1.07 | 0.00±0.00  |
| <i>Leucocoprinus</i>  | 8.02±2.40              | 0.07±0.11  | 53.24±0.42 |
| <i>Coprinus</i>       | 0.00±0.00              | 0.46±0.20  | 6.80±0.18  |
| <i>Acrocalymma</i>    | 0.36±0.36              | 0.00±0.01  | 3.46±0.14  |
| <i>Cephalotrichum</i> | 0.33±0.39              | 1.88±0.26  | 5.02±0.00  |
| <i>Thermomyces</i>    | 0.46±0.24              | 1.55±0.14  | 8.43±0.84  |
| <i>Myceliophthora</i> | 0.40±0.10              | 2.91±0.74  | 2.47±0.14  |
| <i>Tausonia</i>       | 0.01±0.01              | 0.00±0.00  | 0.36±0.13  |
| <i>Idriella</i>       | 4.10±2.64              | 0.03±0.01  | 0.31±0.53  |
| <i>Alternaria</i>     | 4.45±0.15              | 0.27±0.01  | 0.15±0.71  |
| others                | 18.14±3.85             | 93.45±0.93 | 80.23±0.22 |

CK, manganese slag without any treatment; M0, amended manganese slag without plant; M1, amended manganese slag with *K. paniculata* trees being planted.
